# Supplementary material for: How horizontal transport and turbulent mixing impacts aerosol particle and precursor concentrations at a background site in the UAE
Source: Copernicus journal article supplement (doi:10.5194/acp-2022-811), 2023-01-10
Supplement: Supplementary file [file acp-2022-811-AC1-supplement.pdf]

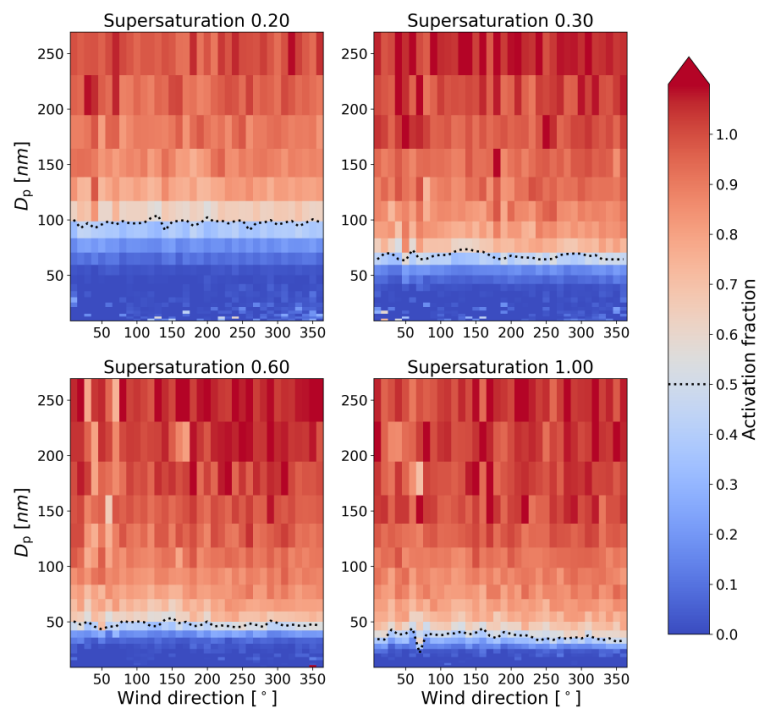

Figure A: New figure replacing Fig. 9 in the previous manuscript version

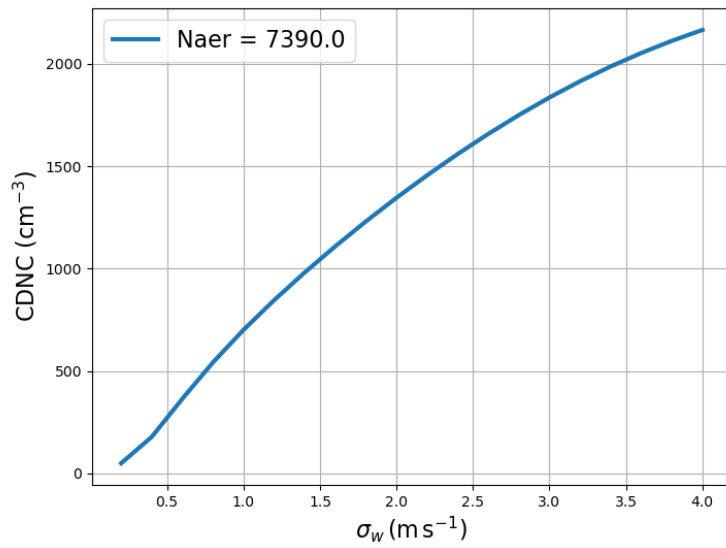

Figure B: Dependence between CDNC and the standard deviation of vertical velocity with measured aerosol size distribution from 19th May, 2018 based on a box model calculation using parameterized cloud droplet activation by Abdul-Razzak and Ghan (2000, <https://doi.org/10.1029/1999JD901161>).
